# Supplementary material for: Analyzing Driving Forces of China’s Carbon Emissions From 1997-2040 and the Potential Emission Reduction Path: Through Decomposition and Scenario Analyses
Source: Research Square preprint supplement (doi:10.21203/rs.3.rs-560303/v1), 2021-06-02
Supplement: Supplementary file 1 [file f56a01a600a342da24eb1eb9.xlsx]

## Sheet: Primary
Mtce	Coal	Oil	Gas
Beijing	0.190295	0.157449	0
Tianjin	0.295606	0.944969	0
Hebei	1.39907	4.69545	0.668973
Shanxi	2.54862	1.5176	0
Inner Mongolia	9.66411	2.12222	0
Liaoning	0.322613	4.66421	0
Jilin	1.44682	2.30037	0.00863191
Heilongjiang	6.65364	5.25179	0
Shanghai	0.00499038	0.860067	0.0215798
Jiangsu	0.711716	6.82848	0
Zhejiang	0.102743	7.53845	0
Anhui	0.829579	2.92652	0
Fujian	0.500505	2.27786	0
Jiangxi	0.308229	1.92801	0
Shandong	0.88359	6.67074	0
Henan	0.45046	5.18305	0.647393
Hubei	2.98914	3.29148	0
Hunan	7.97919	0.689221	0.0194218
Guangdong	0.897534	3.96056	0
Guangxi	0.116834	2.73664	0
Hainan	0	1.59949	0
Chongqing	0.764945	0.710241	0.220114
Sichuan	0.161826	4.65449	0.00431595
Guizhou	2.87142	1.12187	0
Yunnan	3.28006	0.958437	0.00232712
Shannxi	0.289868	1.58971	0
Gansu	0.8349	1.26545	0
Qinghai	0.0465338	0.270236	0
Ningxia	0.0732411	0.224003	0
Xinjiang	3.0089	3.29373	0

## Sheet: Secondary
Mtce	Coal	Oil	Gas
Beijing	3.47547	9.9409	23.964
Tianjin	75.1276	29.4409	13.3341
Hebei	473.529	18.3464	6.65631
Shanxi	493.894	5.95038	13.4679
Inner Mongolia	516.32	3.59349	7.59392
Liaoning	284.44	85.0236	9.69795
Jilin	125.715	16.8277	3.32544
Heilongjiang	150.019	26.8576	6.62067
Shanghai	71.6292	29.4226	11.761
Jiangsu	450.737	53.7762	42.3935
Zhejiang	211.569	46.6271	16.4842
Anhui	231.826	13.236	3.69737
Fujian	124.863	36.039	9.73679
Jiangxi	120.633	10.0413	2.38888
Shandong	527.98	130.69	17.8961
Henan	319.8	16.3181	13.9405
Hubei	161.924	20.7012	6.29759
Hunan	153.924	12.822	3.25113
Guangdong	260.594	68.3349	24.2859
Guangxi	113.676	10.9746	2.5162
Hainan	16.1362	5.64546	8.39453
Chongqing	85.1241	2.90496	12.6069
Sichuan	142.652	36.9755	26.1007
Guizhou	126.122	2.18206	1.84995
Yunnan	96.2669	5.70847	1.89902
Shannxi	216.12	4.60316	18.461
Gansu	89.4995	12.346	2.57015
Qinghai	25.2488	2.27182	7.65713
Ningxia	156.809	0.453529	4.34769
Xinjiang	265.932	26.8977	19.821

## Sheet: tertiary industry
Mtce	Coal	Oil	Gas
Beijing	3.5345	38.5085	9.65172
Tianjin	2.00731	17.1476	4.11958
Hebei	26.4784	28.8711	13.524
Shanxi	20.2661	18.9415	5.72943
Inner Mongolia	17.4897	20.391	3.52182
Liaoning	8.95794	56.8073	3.53045
Jilin	14.7264	12.2226	2.04145
Heilongjiang	37.2882	19.9704	1.96376
Shanghai	0.117567	73.366	5.26115
Jiangsu	0.0989269	54.4688	7.47092
Zhejiang	1.25059	50.0774	5.14386
Anhui	4.42022	32.9152	5.91351
Fujian	0.544538	28.4971	1.08762
Jiangxi	3.39918	22.0501	2.07166
Shandong	15.3713	64.777	10.362
Henan	6.2189	43.0825	6.71082
Hubei	16.9136	50.3985	4.97233
Hunan	26.2978	41.2833	2.39215
Guangdong	4.03184	116.374	5.66253
Guangxi	0.180762	27.6992	0.550284
Hainan	0	8.89945	0.461807
Chongqing	1.65563	23.6002	7.64787
Sichuan	2.71826	51.3239	15.108
Guizhou	45.182	24.6256	1.9933
Yunnan	8.34425	29.2966	0.284768
Shannxi	6.94778	17.7466	6.35562
Gansu	7.13819	13.1569	3.54987
Qinghai	2.09167	5.34849	2.98073
Ningxia	1.24952	3.90732	1.16315
Xinjiang	11.2566	24.7659	6.89042
